# Supplementary material for: A test of the lateral semicircular canal correlation to head posture, diet and other biological traits in “ungulate” mammals
Source: PubMed Central journal article supplement (PMC7658238; doi:10.1038/s41598-020-76757-0), 2020-11-11
Supplement: 41598_2020_76757_MOESM1_ESM.pdf [file 41598_2020_76757_MOESM1_ESM.pdf]

A test of the lateral semicircular canal correlation to head posture, diet and other biological traits in “ungulate” mammals.

Benoit J. <sup>1\*</sup>, Legendre L.J. <sup>2</sup>, Farke A.A. <sup>3</sup>, Neenan J.M. <sup>4</sup>, Mennecart B. <sup>5</sup>, Costeur L. <sup>5</sup>, Merigeaud S. <sup>6</sup>, Manger P.R. <sup>7</sup>

<sup>1</sup>Evolutionary Studies Institute (ESI), School of Geosciences, University of the Witwatersrand, Braamfontein, 2050, Johannesburg, South Africa

<sup>2</sup>Jackson School of Geosciences, The University of Texas at Austin, 2275 Speedway Stop C9000, Austin, TX, United States

<sup>3</sup>Raymond M. Alf Museum of Paleontology at The Webb Schools, 1175 West Baseline Road, Claremont, California, USA

<sup>4</sup>Oxford University Museum of Natural History, Parks Road, Oxford, OX1 3PW, UK.

<sup>5</sup>Naturhistorisches Museum Basel, Augustinergasse 2, 4001 Basel, Switzerland.

<sup>6</sup>Radiologist Groupe CRP, Clinique du Parc, Castelnau le Lez, France

Tridilogy, Saint Gely du Fesc, France

<sup>7</sup>School of Anatomical Sciences, University of the Witwatersrand, 7 York Road, Parktown, 2193, Johannesburg, South Africa.

\*Corresponding author: [julien.benoit@wits.ac.za](mailto:julien.benoit@wits.ac.za).

## Supplementary Figures

**Figure S1.** Ancestral character state reconstruction of the neutral head posture in ungulates using maximum likelihood (fastAnc) in phytools (Revell, 2013). Phylogenetic tree after Bininda-Emonds et al.<sup>56</sup>

**Figure S2.** Ancestral character state reconstruction of of the reconstructed head posture in ungulates using maximum likelihood (fastAnc) in phytools (Revell, 2013). Phylogenetic tree after Bininda-Emonds et al.<sup>56</sup>

**Figure S3.** Ancestral character state reconstruction of body mass variations in ungulates using MCMC stochastic character mapping (make.simmap) in phytools (Revell, 2013). a, continuous data; b, character discretized into a binary data (<100 kg/>100 kg). Phylogenetic tree after Bininda-Emonds et al.<sup>56</sup>

**Figure S4.** Ancestral character state reconstruction of diet variations in ungulates using MCMC stochastic character mapping (make.simmap) in phytools (Revell, 2013). Phylogenetic tree after Bininda-Emonds et al.<sup>56</sup>

**Figure S5.** Ancestral character state reconstruction of the habitats variations in ungulates using MCMC stochastic character mapping (make.simmap) in phytools (Revell, 2013). Phylogenetic tree after Bininda-Emonds et al.<sup>56</sup>

**Figure S6.** Ancestral character state reconstruction of head butting behaviour in ungulates using MCMC stochastic character mapping (make.simmap) in phytools (Revell, 2013). Phylogenetic tree after Bininda-Emonds et al.<sup>56</sup>

### Reference list:

Revell, L.J., 2013. Two new graphical methods for mapping trait evolution on phylogenies. *Methods Ecol Evol* 4, 754–759. <https://doi.org/10.1111/2041-210X.12066>

Fig. S1

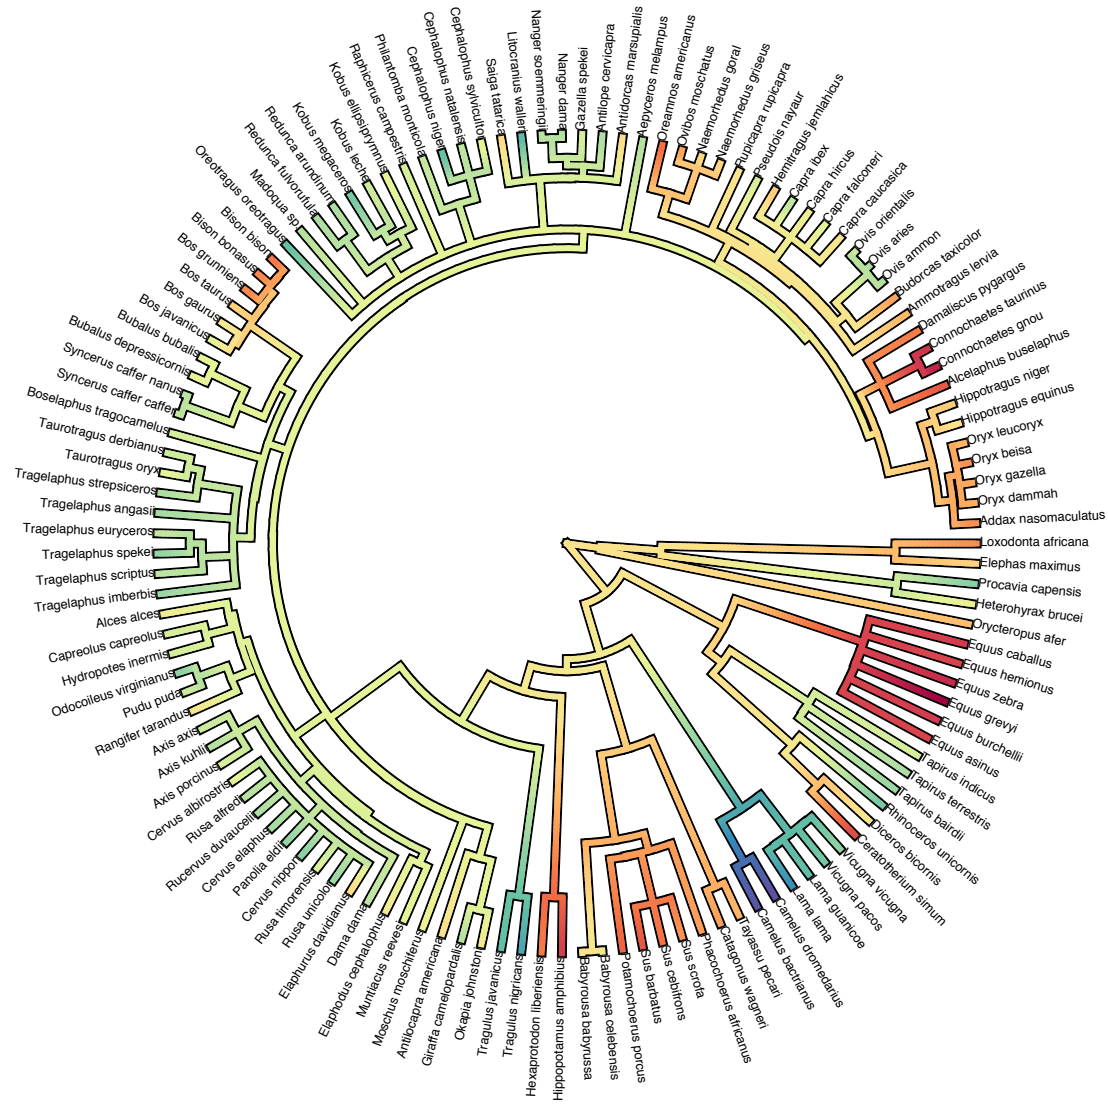

Neutral head posture

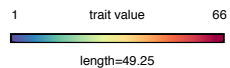









Fig. S5

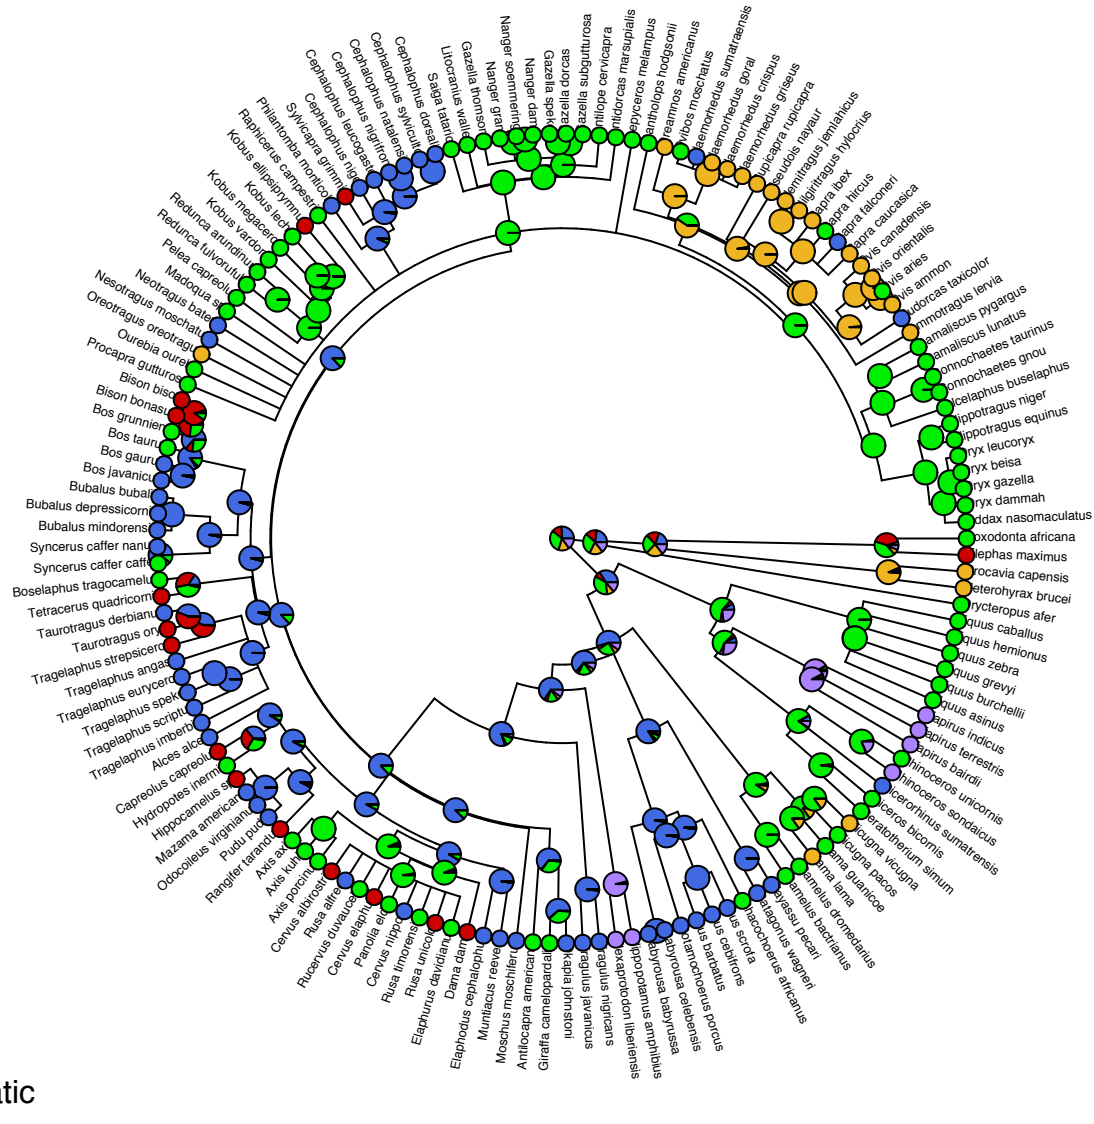

Habitat

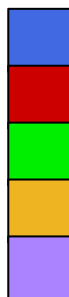

closed

mixed

open

rocky

semi-aquatic
